# Supplementary material for: Actuation performance of a photo-bending crystal modeled by machine learning-based regression
Source: Royal Society of Chemistry journal article supplement (doi:10.1039/d1ce00208b), 2021-01-01
Supplement: d1ce00208b3.xlsx [file d1ce00208b3.xlsx]

## Sheet: Supplementary Table 10
PUV (mW/cm2)	L (μm)	W (μm)	T (μm)	Af (μm)	τf,b (s)	τf,u (s)
180	1589	509	177	4.1	5.7	53
90	1589	509	177	3.8	8.8	50.2
36	1589	509	177	3.1	14	56.1
18	1589	509	177	2.5	22	56.1
90	647	620	168	3.9	7.7	30.8
36	647	620	168	3.3	12.6	35.7
18	647	620	168	2.4	14.7	39.4
3.6	647	620	168	1.1	36.1	30.1
180	1698	638	172	7.7	3.7	78.8
90	1698	638	172	7.7	6.8	68.2
36	1698	638	172	6.5	11.1	62.5
18	1698	638	172	5.8	15.1	71.8
3.6	1698	638	172	3	34.2	49.9
180	1381	488	167	2.2	6.2	51
90	1381	488	167	3	8.5	49.9
36	1381	488	167	2.8	12.3	46.8
18	1381	488	167	2.4	18.8	53.2
3.6	1381	488	167	1.3	41.3	37.4
90	1568	1085	81	4.2	4.7	51.7
36	1568	1085	81	4	9.8	52.9
18	1568	1085	81	3.4	14.4	52
3.6	1568	1085	81	1.9	29.9	54.4
180	1629	1024	150	8.7	3.8	35.9
90	1629	1024	150	8.4	6.4	38
36	1629	1024	150	6.6	10.9	40.7
18	1629	1024	150	5.1	15.6	40.6
3.6	1629	1024	150	2	24.5	40.9
180	1396	571	92	4.3	4.1	48.2
90	1396	571	92	3.8	7.3	44.6
36	1396	571	92	3.1	12.6	43
18	1396	571	92	2.4	16.6	48.8
3.6	1396	571	92	1.2	36.7	54.1
180	1280	1215	212	4.8	8	45.1
90	1280	1215	212	5.2	9	50.2
36	1280	1215	212	4.1	13.3	46.6
18	1280	1215	212	3	18.6	41.6
3.6	1280	1215	212	1.2	31.4	38.6
180	3289	1061	174	6.7	3.5	32.8
90	3289	1061	174	6.3	7	33
36	3289	1061	174	5.4	12.8	43.8
18	3289	1061	174	4	16.3	42
3.6	3289	1061	174	1.6	29.3	35.8
180	4814	718	176	2.7	5.2	74.8
90	4814	718	176	2.8	10.1	74.4
36	4814	718	176	2.3	17.7	60.5
18	4814	718	176	1.8	24.1	59.2
180	2417	657	175	3.8	8.2	64.2
90	2417	657	175	3.9	10.6	62.3
36	2417	657	175	3.2	17.4	61.7
18	2417	657	175	2.4	20	62.6
3.6	2417	657	175	1.1	38.8	55.9
180	3815	542	135	2	6.1	66.5
90	3815	542	135	1.8	10.8	59.3
36	3815	542	135	1.3	14.6	57.7
18	3815	542	135	1	18.9	56.5

## Sheet: Supplementary Table 11
	Linear					2FI					Quadratic					Cubic					Quartic
	Model p-value	Adjusted R2	Predictied R2	Score1	Score2	Model p-value	Adjusted R2	Predictied R2	Score1	Score2	Model p-value	Adjusted R2	Predictied R2	Score1	Score2	Model p-value	Adjusted R2	Predictied R2	Score1	Score2	Model p-value	Adjusted R2	Predictied R2	Score1	Score2
L	0.0008	0.2114	0.1499	0.1499	0.2114	0.2571	0.2162	0.1409	0.0274	0.04204	0.0043	0.3469	0.255	0.255	0.3469	0.2772	0.3635	0.2046	0.0369	0.06556	0.7274	0.331	0.0993	0.00682	0.02275
W	< 0.0001	0.2948	0.2347	0.2347	0.2948	0.0909	0.3206	0.2051	0.11281	0.17634	0.0017	0.4553	0.3695	0.3695	0.4553	0.2405	0.4736	0.3658	0.07604	0.09846	0.9164	0.4284	0.2254	0.01229	0.02337
T	0.0032	0.1673	0.1131	0.1131	0.1673	0.8829	0.1514	0.094	0.005323	0.00857	0.0512	0.2176	0.1452	0.14179	0.2125	0.6716	0.1905	0.0839	0.00624	0.01418	0.774	0.143	-0.748	-0.04832	0.009237
1/L	0.0037	0.1625	0.1001	0.1001	0.1625	0.2109	0.1721	0.0896	0.02124	0.0408	0.0106	0.2842	0.2013	0.2013	0.2842	0.011	0.4135	0.2894	0.2894	0.4135	0.9141	0.3634	0.1695	0.00927	0.01987
1/W	< 0.0001	0.3228	0.2681	0.2681	0.3228	0.0708	0.3528	0.277	0.19562	0.24915	0.0176	0.4287	0.3411	0.3411	0.4287	0.2506	0.4466	0.3082	0.06149	0.089106	0.9151	0.3993	0.1623	0.00886	0.02181
1/T	0.0032	0.167	0.1146	0.1146	0.167	0.879	0.1511	0.1002	0.00569	0.00859	0.0476	0.2197	0.1415	0.1415	0.2197	0.5888	0.2008	0.091	0.00772	0.01705	0.9913	0.1122	-0.9982	-0.05034	0.00565
L/W	< 0.0001	0.3318	0.2848	0.2848	0.3318	0.0642	0.3634	0.317	0.24688	0.283	0.0109	0.4489	0.3843	0.3843	0.4489	0.1469	0.4824	0.3606	0.12273	0.16419	0.4164	0.4838	0.3529	0.04237	0.05809
L/T	0.0003	0.2355	0.1743	0.1743	0.2355	0.2271	0.2427	0.1639	0.03608	0.05343	0.0002	0.439	0.3804	0.3804	0.439	0.3312	0.4473	0.3715	0.05608	0.06752	0.8516	0.4072	0.2825	0.01658	0.023907
W/L	0.0009	0.208	0.1456	0.1456	0.208	0.0646	0.2453	0.0503	0.03893	0.18986	< 0.0001	0.5209	0.4565	0.4565	0.5209	0.2268	0.5386	0.4143	0.09133	0.11873	0.8433	0.5059	-0.1643	-0.00974	0.02999
W/T	0.0012	0.1993	0.1379	0.1379	0.1993	0.0517	0.2426	0.1383	0.13375	0.23462	0.0112	0.3438	0.2107	0.2107	0.3438	0.0848	0.4021	0.3025	0.17836	0.23708	0.2532	0.4262	0.159	0.03139	0.08416
T/L	0.0036	0.1636	0.1029	0.1029	0.1636	0.2675	0.1677	0.0851	0.015906	0.03134	0.0031	0.3158	0.2378	0.2378	0.3158	0.0312	0.4086	0.2956	0.2956	0.4086	0.5603	0.3948	-0.0858	-0.00765	0.03523
T/W	0.0003	0.2364	0.1785	0.1785	0.2364	0.0887	0.2648	0.2014	0.11352	0.14926	0.0481	0.324	0.2294	0.2294	0.324	0.5262	0.3132	0.1196	0.01136	0.02976	0.0014	0.5211	0.2836	0.2836	0.5211
SLW	0.0037	0.1624	0.091	0.091	0.1624	0.8517	0.1466	0.0273	0.0016	0.0086	0.0351	0.2253	0.0789	0.0789	0.2253	0.0103	0.3671	0.1232	0.1232	0.3671	0.0039	0.5314	0.3668	0.3668	0.5314
SLT	0.0017	0.1882	0.1271	0.1271	0.1882	0.3023	0.1895	0.1127	0.01864	0.03134	0.0194	0.2819	0.2002	0.2002	0.2819	0.4204	0.2816	0.148	0.017602	0.03349	0.3827	0.2884	-0.2609	-0.03408	0.03767
SWT	0.0003	0.2419	0.175	0.175	0.2419	0.278	0.2449	0.0591	0.01062	0.04404	0.0005	0.4218	0.3189	0.3189	0.4218	0.1372	0.459	0.3571	0.13013	0.16727	0.6089	0.4419	0.2501	0.02053	0.03628
V	0.0036	0.1637	0.094	0.094	0.1637	0.8938	0.1476	0.0313	0.00175	0.00825	0.0292	0.232	0.0942	0.0942	0.232	0.1608	0.275	0.0303	0.009421	0.085509	0.9688	0.2022	-0.2382	-0.01229	0.01043

## Sheet: Supplementary Table 12
Source	Sum of Squares	df	Mean Square	F-value	p-value
Model	117.02	5	23.4	12.74	< 0.0001
PUV	46.08	1	46.08	25.09	< 0.0001
W/L	0.2083	1	0.2083	0.1134	0.7377
PUV W/L	2.79	1	2.79	1.52	0.224
PUV²	18.92	1	18.92	10.3	0.0024
W/L²	42.88	1	42.88	23.35	< 0.0001
Residual	90.01	49	1.84	-	-
Cor Total	207.03	54	-	-	-

## Sheet: Supplementary Table 13
	Linear					2FI					Quadratic					Cubic					Quartic
	Model p-value	Adjusted R2	Predictied R2	Score1	Score2	Model p-value	Adjusted R2	Predictied R2	Score1	Score2	Model p-value	Adjusted R2	Predictied R2	Score1	Score2	Model p-value	Adjusted R2	Predictied R2	Score1	Score2	Model p-value	Adjusted R2	Predictied R2	Score1	Score2
L	< 0.0001	0.776	0.7484	0.7484	0.776	0.9722	0.7716	0.7343	0.037764	0.03968	0.2368	0.7758	0.7256	0.1532	0.163809	0.6666	0.7682	0.6789	0.05092	0.05762	0.9503	0.7463	0.5637	0.02965	0.03926
W	< 0.0001	0.7821	0.7463	0.7463	0.7821	0.3661	0.7814	0.6794	0.09278	0.10671	0.0704	0.7958	0.6831	0.48515	0.56519	0.0091	0.8342	0.6983	0.6983	0.8342	0.0109	0.8698	0.8016	0.8016	0.8698
T	< 0.0001	0.794	0.7644	0.7644	0.794	0.0219	0.8107	0.7744	0.7744	0.8107	0.4146	0.81	0.7674	0.09254	0.09768	0.4365	0.8094	0.7369	0.08441	0.09271	0.1766	0.8217	0.7115	0.20144	0.23264
1/L	< 0.0001	0.7716	0.7455	0.7455	0.7716	0.9236	0.7672	0.7242	0.039205	0.041533	0.2143	0.7724	0.7238	0.16887	0.18021	0.2753	0.7783	0.6805	0.12359	0.14135	0.638	0.7702	0.4346	0.03405	0.06036
1/W	< 0.0001	0.7853	0.7528	0.7528	0.7853	0.205	0.7879	0.7196	0.17551	0.19217	0.3346	0.7889	0.7014	0.10481	0.11788	0.494	0.7865	0.6277	0.06353	0.0796	0.0779	0.8109	0.6056	0.3887	0.52047
1/T	< 0.0001	0.7928	0.7623	0.7623	0.7928	0.0247	0.8088	0.7674	0.7674	0.8088	0.4265	0.8078	0.7613	0.08924	0.0947	0.3729	0.8092	0.7371	0.09883	0.1085	0.2865	0.8152	0.1231	0.02148	0.14226
L/W	< 0.0001	0.7907	0.7622	0.7622	0.7907	0.3272	0.7906	0.7492	0.11448	0.12081	0.3321	0.7916	0.7258	0.10927	0.11918	0.0209	0.8236	0.6827	0.6827	0.8236	0.0115	0.861	0.6771	0.6771	0.861
L/T	< 0.0001	0.7701	0.7405	0.7405	0.7701	0.7868	0.7659	0.7179	0.04562	0.04867	0.0178	0.7933	0.7436	0.7436	0.7933	0.0202	0.8253	0.7769	0.7769	0.8253	0.8936	0.8112	0.7143	0.03996	0.04538
W/L	< 0.0001	0.7753	0.7404	0.7404	0.7753	0.9647	0.7709	0.6403	0.03318	0.03995	0.0006	0.8242	0.725	0.725	0.8242	0.0008	0.8732	0.8411	0.8411	0.8732	0.4253	0.8734	0.6839	0.0804	0.10268
W/T	< 0.0001	0.8065	0.7732	0.7732	0.8065	0.0002	0.8507	0.827	0.827	0.8507	0.5585	0.8482	0.8205	0.073455	0.07593	0.4859	0.8467	0.8138	0.083741	0.087126	0.7693	0.8378	0.7988	0.05191	0.05445
T/L	< 0.0001	0.7709	0.743	0.743	0.7709	0.2145	0.7735	0.723	0.16853	0.1803	0.2546	0.777	0.7224	0.14186	0.15259	0.1227	0.7927	0.7185	0.29278	0.32302	0.4226	0.793	0.755	0.08932	0.09382
T/W	< 0.0001	0.8033	0.7754	0.7754	0.8033	0.01	0.8241	0.7907	0.7907	0.8241	0.0509	0.8379	0.7995	0.78536	0.82308	0.3402	0.84	0.7966	0.11707	0.12345	0.1409	0.8526	0.7792	0.2765	0.30255
SLW	< 0.0001	0.7702	0.7401	0.7401	0.7702	0.3618	0.7695	0.7175	0.09915	0.10634	0.3233	0.7709	0.7014	0.10847	0.11922	0.4435	0.77	0.6708	0.075625	0.086809	0.4505	0.7691	0.6459	0.071687	0.08536
SLT	< 0.0001	0.7815	0.7541	0.7541	0.7815	0.7588	0.7777	0.7412	0.04884	0.05124	0.2458	0.7815	0.7319	0.14888	0.15897	0.298	0.7861	0.618	0.10369	0.13189	0.1412	0.803	0.2146	0.07599	0.28434
SWT	< 0.0001	0.7704	0.7353	0.7353	0.7704	0.7115	0.7665	0.6617	0.0465	0.05386	0.1722	0.7738	0.6589	0.19131	0.22468	0.0751	0.7952	0.4562	0.30372	0.52942	0.0345	0.8277	0.6427	0.6427	0.8277
V	< 0.0001	0.7709	0.7397	0.7397	0.7709	0.604	0.7677	0.7087	0.05866	0.06355	0.1353	0.7772	0.7046	0.26038	0.28721	0.0515	0.8023	0.7001	0.6797	0.77893	0.516	0.7992	0.5696	0.05519	0.07744

## Sheet: Supplementary Table 14
Source	Sum of Squares	df	Mean Square	F-value	p-value
Model	0.2065	9	0.0229	42.33	< 0.0001
PUV	0.0075	1	0.0075	13.92	0.0005
W/L	0.0009	1	0.0009	1.62	0.2094
PUV W/L	0.0053	1	0.0053	9.75	0.0031
PUV²	0.0044	1	0.0044	8.19	0.0064
W/L²	0.0132	1	0.0132	24.44	< 0.0001
PUV² W/L	0.0024	1	0.0024	4.51	0.0392
PUV W/L²	0.0091	1	0.0091	16.83	0.0002
PUV³	0.0003	1	0.0003	0.5043	0.4813
W/L³	0.0028	1	0.0028	5.09	0.0289
Residual	0.0244	45	0.0005	-	-
Cor Total	0.2308	54	-	-	-

## Sheet: Supplementary Table 15
	Linear					2FI					Quadratic					Cubic					Quartic
	Model p-value	Adjusted R²	Predicted R²	Score1	Score2	Model p-value	Adjusted R²	Predicted R²	Score1	Score2	Model p-value	Adjusted R²	Predicted R²	Score1	Score2	Model p-value	Adjusted R²	Predicted R²	Score1	Score2	Model p-value	Adjusted R²	Predicted R²	Score1	Score2
L	0.0162	0.1139	0.041	0.041	0.1139	0.8573	0.0971	-0.0053	-0.0003	0.00566	0.5017	0.0863	-0.1219	-0.01214	0.0086	0.0008	0.3397	0.1281	0.1281	0.3397	0.8614	0.2906	-0.5193	-0.03014	0.01686
W	0.0236	0.1008	0.0381	0.0381	0.1008	0.1755	0.1159	0.0335	0.00954	0.03301	0.7436	0.0909	-0.0585	-0.00393	0.00611	0.1706	0.1389	-0.1223	-0.03584	0.0407	0.2376	0.1774	-0.0129	-0.002714	0.03733
T	0.5334	-0.0137	-0.0731	-0.00685	-0.001284	0.5035	-0.0244	-0.0798	-0.00792	-0.002423	0.924	-0.0628	-0.1526	-0.00825	-0.00339	0.4969	-0.0753	-0.2601	-0.02617	-0.00757	0.7184	-0.1286	-1.1801	-0.08213	-0.00895
1/L	0.0002	0.2507	0.1786	0.1786	0.2507	0.9677	0.236	0.1159	0.005988	0.01219	0.399	0.2341	0.0861	0.01078	0.029335	0.7532	0.1999	-0.1426	-0.009466	0.01327	0.1479	0.2606	-0.1338	-0.045233	0.0881
1/W	0.0477	0.0762	0.0123	0.0123	0.0762	0.2358	0.084	0.0054	0.00114	0.0178	0.1604	0.1152	-0.0066	-0.00205	0.0359	0.5399	0.0995	-0.1405	-0.01301	0.00921	0.3886	0.107	-0.2252	-0.02897	0.01376
1/T	0.516	-0.0124	-0.0715	-0.00692	-0.0012	0.4813	-0.0221	-0.0707	-0.00734	-0.00229	0.9051	-0.0595	-0.1413	-0.0078	-0.00328	0.6365	-0.0916	-0.4469	-0.0351	-0.00719	0.8791	-0.1765	-0.5951	-0.03384	-0.01003
L/W	0.0001	0.2696	0.2205	0.2205	0.2696	0.7281	0.257	0.2078	0.01427	0.017648	0.2582	0.2683	0.1805	0.034953	0.05195	0.7686	0.2342	0.0797	0.00518	0.01523	0.7813	0.1882	-0.1084	-0.00693	0.01204
L/T	0.0079	0.1381	0.0721	0.0721	0.1381	0.6617	0.1245	0.041	0.00309	0.0094	0.8966	0.0928	-0.0536	-0.00298	0.00517	0.0004	0.3679	0.2064	0.2064	0.3679	0.5384	0.3554	0.0975	0.00905	0.033
W/L	< 0.0001	0.2901	0.2272	0.2272	0.2901	0.826	0.2769	0.1755	0.0106	0.01676	0.6909	0.2587	0.1104	0.00798	0.01872	0.2914	0.2753	0.0143	0.00245	0.047237	0.7466	0.2361	-1.5361	-0.10287	0.015811
W/T	0.4607	-0.008	-0.0881	-0.00956	0.00086	0.034	0.0598	-0.0708	-0.0708	0.0598	0.0347	0.1469	0.0417	0.0417	0.1469	0.0591	0.2376	0.0192	0.01624	0.20101	0.5172	0.2254	-0.7623	-0.07369	0.02179
T/L	0.0004	0.2301	0.1618	0.1618	0.2301	0.6401	0.2183	0.1193	0.00931	0.01705	0.4118	0.2154	0.083	0.01007	0.02615	0.5004	0.2057	0.0105	0.00104	0.02055	0.1482	0.2659	-0.0161	-0.00543	0.0897
T/W	0.1308	0.0397	-0.032	-0.012232	0.01517	0.0937	0.0738	-0.0163	-0.00869	0.03938	0.8724	0.0414	-0.0994	-0.00569	0.00237	0.011	0.2141	0.0261	0.0261	0.2141	0.1344	0.2785	0.1399	0.05204	0.1036
SLW	0.5956	-0.018	-0.1378	-0.01156	-0.00151	0.4593	-0.0267	-0.2698	-0.02937	-0.0029	0.044	0.0592	-0.2324	-0.2324	0.0592	0.1327	0.1215	-0.451	-0.16993	0.04577	0.0077	0.3235	-0.1996	-0.1996	0.3235
SLT	0.0491	0.0752	-0.0031	-0.0031	0.0752	0.9317	0.0572	-0.0576	-0.00309	0.00306	0.8702	0.0243	-0.1637	-0.0094	0.00139	0.0653	0.1234	-0.212	-0.16232	0.09448	0.0289	0.27	-0.4347	-0.4347	0.27
SWT	0.0351	0.0871	0.0273	0.0273	0.0871	0.6381	0.0732	-0.0078	-0.0006	0.00573	0.9272	0.0384	-0.0947	-0.0051	-0.00207	0.0291	0.1718	-0.1182	-0.1182	0.1718	0.2276	0.2113	-0.2713	-0.0596	-0.04641
V	0.6398	-0.0208	-0.1349	-0.01054	-0.00162	0.6194	-0.0357	-0.272	-0.02195	-0.00288	0.1225	0.0106	-0.2884	-0.11771	0.00432	0.0294	0.1474	-0.3865	-0.3865	0.1474	0.8761	0.0816	-0.6718	-0.3834	0.00465

## Sheet: Supplementary Table 16
Source	Sum of Squares	df	Mean Square	F-value	p-value
Model	0.0004	2	0.0002	12.04	< 0.0001
PUV	3.17e-06	1	3.17e-06	0.178	0.6749
W/L	0.0004	1	0.0004	22.78	< 0.0001
Residual	0.0009	52	0	-	-
Cor Total	0.0014	54	-	-	-
