# Supplementary material for: Actuation performance of a photo-bending crystal modeled by machine learning-based regression
Source: Royal Society of Chemistry journal article supplement (doi:10.1039/d1ce00208b), 2021-01-01
Supplement: d1ce00208b4.xlsx [file d1ce00208b4.xlsx]

## Sheet: Supplementary Table 3
PUV (mW/cm2)	L (μm)	W (μm)	T (μm)	Ad (μm)	τd,b (s)	τd,u (s)
120	3414	627	119	80.2	12.4	24
90	3414	627	119	70.4	13.9	24.5
60	3414	627	119	59.7	16	22.8
60	845	483	52	46.2	6.6	25.7
30	845	483	52	40.3	10.4	23.1
90	1347	316	200	42.8	10.1	13.8
90	2006	396	115	20.5	4.1	9.4
60	2006	396	115	17.3	4.9	8.1
120	1899	337	99	83.8	4.9	19.2
90	3279	441	99	113.3	11	19.4
120	1394	323	117	41.1	7.5	30.3
90	1394	323	117	34.3	9.8	29.8
60	1394	323	117	30.6	13.3	29
30	1394	323	117	20	18.6	25.3
120	2779	554	138	65.6	10.4	23.3
90	2779	554	138	60.5	10.8	21.7
60	2779	554	138	48.1	12.7	21.3
30	2779	554	138	30.1	15.2	19.2
120	2170	301	88	148.1	5.3	18.3
90	2170	301	88	136.8	6.7	19.1
30	2170	301	88	75.4	13	14.3
30	1393	411	113	17.8	13.3	15.5
60	2169	506	124	46.6	8.6	12.7
30	2169	506	124	26.8	11.7	11.8
120	2576	601	76	165.5	5.7	13.3
90	2576	601	76	161.4	6.6	13.3
120	3368	638	183	79.2	20.8	44.1
90	3368	638	183	70.8	23.2	40.5
60	3368	638	183	58.4	26.7	37.8
30	3368	638	183	41	32.5	33.3
120	2896	488	167	14.5	13.5	21.1
120	3106	1085	81	138.7	6.1	27.2
90	3106	1085	81	126	6.9	26.6
60	3106	1085	81	102.8	8.5	26.4
30	3106	1085	81	67.8	12.1	20.5
60	2053	1024	150	19.9	9	15.8
30	2053	1024	150	19	8.1	18.2
120	2185	571	92	40.4	7.3	24.7
90	2185	571	92	36.5	8.3	24.7
60	2185	571	92	33.3	9.7	21.1
30	2185	571	92	21.6	12.7	19.6
90	2594	509	177	26	9.3	18.3

## Sheet: Supplementary Table 4
	Linear					2FI					Quadratic					Cubic					Quartic
	Model p-value	Adjusted R2	Predictied R2	Score1	Score2	Model p-value	Adjusted R2	Predictied R2	Score1	Score2	Model p-value	Adjusted R2	Predictied R2	Score1	Score2	Model p-value	Adjusted R2	Predictied R2	Score1	Score2	Model p-value	Adjusted R2	Predictied R2	Score1	Score2
L	0.0011	0.2595	0.2046	0.2046	0.2595	0.7823	0.2415	0.1811	0.0116	0.0154	0.9983	0.1995	0.0998	0.005	0.01	0.4514	0.1944	0.0538	0.006	0.0215	0.9522	0.1011	-0.0777	0	0
W	0.0019	0.2377	0.1565	0.1565	0.2377	0.3792	0.2336	0.1347	0.0178	0.0308	0.422	0.2289	0.0956	0.0113	0.0271	0.7611	0.1801	-0.1732	-0.0114	0.0118	0.0608	0.3136	-0.2061	0	0
T	< 0.0001	0.3607	0.2911	0.2911	0.3607	0.068	0.3996	0.3167	0.2329	0.2938	0.0553	0.4604	0.323	0.292	0.4163	0.3128	0.4746	0.1837	0.0294	0.0759	0.182	0.5159	0.2087	0	0
1/L	0.0025	0.2275	0.1569	0.1569	0.2275	0.2639	0.2331	0.1723	0.0326	0.0442	0.4099	0.2297	0.1786	0.0218	0.028	0.9021	0.1605	-0.4907	-0.0272	0.0089	0.6604	0.1172	-0.2141	0	0
1/W	0.0054	0.1959	0.0936	0.0936	0.1959	0.7203	0.1775	0.0144	0.000999	0.0123	0.0337	0.2809	0.1288	0.1288	0.2809	0.1133	0.3549	0.172	0.0759	0.1566	0.5423	0.3374	0.0065	0	0
1/T	< 0.0001	0.3537	0.2447	0.2447	0.3537	0.0033	0.473	0.3943	0.3943	0.473	0.8219	0.4497	0.2641	0.0161	0.0274	0.0053	0.604	0.2382	0.2382	0.604	0.4643	0.6002	0.4769	0	0
L/W	0.0058	0.1929	0.1025	0.1025	0.1929	0.8276	0.1727	0.0163	0.00098	0.0104	0.0299	0.2814	0.1087	0.1087	0.2814	0.2727	0.3084	0.1355	0.0248	0.0565	0.7694	0.2576	-0.5786	0	0
L/T	< 0.0001	0.5654	0.5202	0.5202	0.5654	0.2382	0.5702	0.5142	0.1079	0.1197	0.805	0.5518	0.4618	0.0287	0.0343	0.9354	0.5082	0.2811	0.015	0.0272	0.2358	0.5359	0.1787	0	0
W/L	0.0081	0.1786	0.1129	0.1129	0.1786	0.5947	0.1633	0.0478	0.004	0.0137	0.724	0.1326	-0.0478	-0.0033	0.0092	0.1512	0.2042	-0.2515	-0.0832	0.0675	0.1334	0.287	-0.4854	0	0
W/T	< 0.0001	0.376	0.3288	0.3288	0.376	0.1573	0.3928	0.3203	0.1018	0.1249	0.9911	0.3594	0.2265	0.0114	0.0181	0.4986	0.3493	0.208	0.0209	0.035	0.5827	0.326	-1.3197	0	0
T/L	< 0.0001	0.4459	0.2705	0.2705	0.4459	0.4533	0.4398	0.1784	0.0197	0.0485	0.0003	0.6262	0.2764	0.2764	0.6262	0.5376	0.6175	0.3958	0.0368	0.0574	0.9587	0.5724	-259.755	0	0
T/W	0.0001	0.3324	0.2561	0.2561	0.3324	0.1655	0.349	0.2485	0.0751	0.1054	0.2874	0.3589	0.2814	0.049	0.0624	0.7829	0.3158	-24.8201	-1.5851	0.0202	0.3099	0.3372	-305.796	0	0
SLW	0.0006	0.2814	0.222	0.222	0.2814	0.5881	0.2682	0.2028	0.0172	0.0228	0.3975	0.2661	0.1873	0.02356	0.0335	0.8159	0.2125	0.0898	0.0055	0.013	0.9953	0.1063	-0.2333	0	0
SLT	0.0058	0.1926	0.1261	0.1261	0.1926	0.2358	0.2018	0.1224	0.026	0.0428	0.9774	0.1585	0.0554	0.00028	0.0081	0.7934	0.1005	-0.1547	-0.0097	0.0063	0.4854	0.0874	-1.1857	0	0
SWT	0.0061	0.1907	0.1255	0.1255	0.1907	0.509	0.179	0.0916	0.009	0.0176	0.9977	0.1335	0.0018	9e-05	0.0067	0.2797	0.1642	0.0174	0.0031	0.0294	0.6459	0.1236	-0.3731	0	0
V	0.0079	0.1796	0.1124	0.1124	0.1796	0.6669	0.1621	0.0831	0.0062	0.0122	0.9999	0.1156	0.0068	0.00034	0.0058	0.9187	0.033	-0.1538	-0.0084	0.0018	0.9864	-0.0919	-0.6553	0	0

## Sheet: Supplementary Table 5
Source	Sum of Squares	df	Mean Square	F-value	p-value
Model	43384.3	2	21692.2	27.67	< 0.0001
PUV	8689.77	1	8689.77	11.09	0.0019
L/T	27244.9	1	27244.9	34.76	< 0.0001
Residual	30570	39	783.85	-	-
Cor Total	73954.3	41	-	-	-

## Sheet: Supplemetary Table 6
	Linear					2FI					Quadratic					Cubic					Quartic
	Model p-value	Adjusted R2	Predictied R2	Score1	Score2	Model p-value	Adjusted R2	Predictied R2	Score1	Score2	Model p-value	Adjusted R2	Predictied R2	Score1	Score2	Model p-value	Adjusted R2	Predictied R2	Score1	Score2	Model p-value	Adjusted R2	Predictied R2	Score1	Score2
L	0.0004	0.2974	0.2354	0.2354	0.2974	0.177	0.3131	0.2232	0.0631	0.0884	0.0369	0.3963	0.2757	0.2757	0.3963	0.5722	0.3783	0.1929	0.0169	0.0331	0.5604	0.3591	-0.1618	0	0
W	0.0349	0.1149	0.0448	0.0448	0.1149	0.3993	0.1086	-0.0309	-0.0039	0.0136	0.0316	0.2234	0.1008	0.1008	0.2234	0.2302	0.2631	0.002	0.00043	0.0571	0.4192	0.264	-0.246	0	0
T	< 0.0001	0.3815	0.3388	0.3388	0.3815	0.0637	0.4209	0.3777	0.2965	0.3304	0.5748	0.4072	0.3286	0.0286	0.0354	0.9043	0.3537	0.2096	0.0116	0.0196	0.6846	0.3173	-0.0376	0	0
1/L	0.0058	0.1929	0.1369	0.1369	0.1929	0.2028	0.2067	0.1252	0.0309	0.051	0.3895	0.2054	0.0282	0.0036	0.0264	0.0011	0.4878	-0.166	-0.166	0.4878	0.5271	0.4756	-3.6686	0	0
1/W	0.0205	0.1388	0.0629	0.0629	0.1388	0.1722	0.159	0.0755	0.0219	0.0462	0.5332	0.1428	0.0211	0.002	0.0134	0.0675	0.2606	-0.0998	-0.0739	0.193	0.2358	0.3022	-0.4008	0	0
1/T	0.0002	0.3176	0.2561	0.2561	0.3176	0.0115	0.4094	0.3819	0.3819	0.4094	0.5233	0.3986	0.3506	0.0335	0.0381	0.8012	0.3562	0.2778	0.0173	0.0222	0.9415	0.2837	-5.8348	0	0
L/W	0.0123	0.1609	0.0975	0.0975	0.1609	0.682	0.1427	0.0448	0.0033	0.0105	0.2449	0.1631	0.068	0.0139	0.0333	0.9009	0.0882	-0.3566	-0.0198	0.0049	0.821	0.0116	-3.0847	0	0
L/T	0.0127	0.1597	0.0854	0.0854	0.1597	0.4622	0.1499	0.0554	0.006	0.0162	0.0157	0.2876	0.1317	0.1317	0.2876	0.3538	0.2988	0.0375	0.0053	0.0422	0.2664	0.3306	-0.0234	0	0
W/L	0.0062	0.1898	0.1396	0.1396	0.1898	0.7913	0.17	0.1102	0.007	0.0107	0.83	0.1329	0.0601	0.0036	0.008	0.9552	0.0441	-0.1328	-0.007	0.0023	0.9397	-0.0631	-1.9547	0	0
W/T	0.009	0.1744	0.1219	0.1219	0.1744	0.833	0.1537	0.0992	0.006	0.0092	0.7572	0.1203	0.0599	0.004	0.0079	0.8741	0.0464	-0.0737	-0.0042	0.0027	0.7452	-0.0189	-0.1943	0	0
T/L	0.0304	0.1212	0.0761	0.0761	0.1212	0.5452	0.1068	0.064	0.0059	0.0098	0.7564	0.0717	-0.0033	-0.0002	0.0047	0.8946	-0.0102	-37.5997	-2.10148	-0.00057	0.544	-0.0379	-5.8499	0	0
T/W	0.0126	0.1601	0.1077	0.1077	0.1601	0.7604	0.1402	0.0885	0.0058	0.0092	0.6706	0.1123	-0.0252	-0.0019	0.0084	0.8967	0.0337	-1.9826	-0.1105	0.0019	0.9755	-0.0863	-1551.26	0	0
SLW	0.0128	0.1591	0.072	0.072	0.1591	0.4092	0.1525	-0.0127	-0.0016	0.0186	0.0624	0.2332	0.0697	0.0558	0.1869	0.03	0.3768	0.1989	0.1989	0.3768	0.1407	0.4389	0.095	0	0
SLT	< 0.0001	0.4957	0.461	0.461	0.4957	0.0214	0.5506	0.5229	0.5229	0.5506	0.5361	0.5418	0.5058	0.0472	0.0505	0.9537	0.495	0.4034	0.0211	0.026	0.5718	0.4782	0.2018	0	0
SWT	0.0017	0.2422	0.1282	0.1282	0.2422	0.0036	0.3799	0.3029	0.3029	0.3799	0.2347	0.3961	0.3198	0.0681	0.0844	0.7737	0.3566	0.2327	0.015	0.023	0.7733	0.3088	-0.0382	0	0
V	0.0001	0.3419	0.2781	0.2781	0.3419	0.0259	0.4082	0.3395	0.3395	0.4082	0.6034	0.3927	0.3064	0.0254	0.0325	0.8142	0.3485	0.2017	0.0124	0.0214	0.2846	0.374	0.0426	0	0

## Sheet: Supplementary Table 7
Source	Sum of Squares	df	Mean Square	F-value	p-value
Model	0.056	3	0.0187	17.74	< 0.0001
PUV	0.0105	1	0.0105	10	0.0031
SLT	0.0353	1	0.0353	33.56	< 0.0001
PUV SLT	0.0061	1	0.0061	5.76	0.0214
Residual	0.04	38	0.0011	-	-
Cor Total	0.096	41	-

## Sheet: Supplementary Table 8
	Linear					2FI					Quadratic					Cubic					Quartic
	Model p-value	Adjusted R2	Predictied R2	Score1	Score2	Model p-value	Adjusted R2	Predictied R2	Score1	Score2	Model p-value	Adjusted R2	Predictied R2	Score1	Score2	Model p-value	Adjusted R2	Predictied R2	Score1	Score2	Model p-value	Adjusted R2	Predictied R2	Score1	Score2
L	0.2074	0.0302	-0.0477	-0.0115	0.0073	0.6628	0.0097	-0.0996	-0.0075	0.000731	0.0011	0.2849	0.2157	0.2157	0.2849	0.9666	0.2093	0.0396	0.002	0.0108	0.828	0.1417	-0.1544	0	0
W	0.1908	0.0343	-0.0265	-0.0069	0.009	0.8311	0.0101	-0.0421	-0.0025	0.0006	0.6498	-0.0201	-0.1135	-0.0087	-0.0015	0.5288	-0.0423	-0.3761	-0.0356	-0.004	0.3311	-0.0164	-0.578	0	0
T	0.4961	-0.0142	-0.0934	-0.0094	-0.0014	0.6328	-0.0345	-0.151	-0.0119	-0.0027	0.3522	-0.0305	-0.224	-0.0318	-0.0043	0.5178	-0.0507	-0.3867	-0.0373	-0.00489	0.6083	-0.0938	-0.8515	0	0
1/L	0.6344	-0.027	-0.0994	-0.00783	-0.00212	0.4944	-0.041	-0.1381	-0.01396	-0.00414	0.03	0.0957	-0.0496	-0.0496	0.0957	0.0452	0.2427	-0.1473	-0.1473	0.2427	0.8048	0.1817	-36.054	0	0
1/W	0.209	0.0298	-0.0394	-0.0094	-0.0071	0.9489	0.0044	-0.0716	-0.0038	0.00023	0.4912	-0.0102	-0.1304	-0.0133	-0.001	0.4052	-0.0065	-0.5261	-0.06591	-0.0008	0.4485	-0.0124	-1.2561	0	0
1/T	0.6363	-0.0272	-0.103	-0.00809	-0.00213	0.3049	-0.025	-0.0998	-0.01636	-0.004099	0.4067	-0.0292	-0.1433	-0.01761	-0.003589	0.5199	-0.0498	-1.0744	-0.103327	-0.00478	0.8929	-0.1548	-6.6049	0	0
L/W	0.4464	-0.0087	-0.0587	-0.00657	-0.00097	0.8696	-0.0345	-0.074	-0.00425	-0.00198	0.7822	-0.0772	-0.1985	-0.01268	-0.00493	0.9533	-0.1869	-0.7616	-0.0399	-0.0098	0.7986	-0.2811	-3.5187	0	0
L/T	0.1612	0.0426	-0.0164	-0.0051	0.0132	0.9238	0.0177	-0.0569	-0.0031	0.00095	0.8268	-0.026	-0.1809	-0.0109	-0.0016	0.6037	-0.0625	-0.3126	-0.0259	-0.0052	0.2961	-0.0247	-0.2975	0	0
W/L	0.4085	-0.0041	-0.0608	-0.00744	-0.0005	0.9148	-0.0302	-0.0735	-0.00401	-0.00165	0.7929	-0.0735	-0.143	-0.00901	-0.00463	0.9999	-0.2064	-0.4177	-0.02088	-0.01032	0.9851	-0.3614	-1.8281	0	0
W/T	0.3743	0.0004	-0.0578	-0.0077	5e-05	0.6008	-0.0185	-0.0869	-0.0072	-0.0015	0.7272	-0.0562	-0.1704	-0.0117	-0.0039	0.9012	-0.1508	-0.5101	-0.0283	-0.0084	0.4557	-0.1596	-0.7283	0	0
T/L	0.5642	-0.0209	-0.1036	-0.00918	-0.00185	0.8694	-0.047	-0.1525	-0.00877	-0.0027	0.677	-0.0815	-1.3835	-0.10217	-0.00601	0.6675	-0.1322	-27.4833	-2.05867	-0.0099	0.7867	-0.2193	-1230.93	0	0
T/W	0.4398	-0.0079	-0.0785	-0.0089	-0.00089	0.6632	-0.0292	-0.1225	-0.0092	-0.0022	0.8212	-0.0746	-1.1854	-0.07217	-0.004542	0.5322	-0.0986	-6.5456	-0.61495	-0.00926	0.9131	-0.2139	-1161.17	0	0
SLW	0.0926	0.0695	0.0062	0.0033	0.0375	0.8337	0.0461	-0.0199	-0.0012	0.0028	0.6862	0.014	-0.1105	-0.0081	0.001	0.0458	0.1735	0.0387	0.0387	0.1735	0.2487	0.2161	-0.1166	0	0
SLT	0.107	0.0625	0.0019	0.00088	0.0292	0.6902	0.0419	-0.0417	-0.003	0.003	0.0328	0.1636	0.1256	0.1256	0.1636	0.9089	0.0873	0.0051	0.00028	0.0048	0.98	-0.0278	-0.5926	0	0
SWT	0.1396	0.0497	-0.032	-0.0115	0.0178	0.3458	0.0475	-0.0263	-0.0038	0.0069	0.7417	0.0112	-0.1391	-0.0094	0.00075	0.0823	0.1343	0.0241	0.0146	0.0816	0.9976	0.0154	-0.4871	0	0
V	0.0291	0.123	0.0575	0.0575	0.123	0.5965	0.1067	0.0326	0.0027	0.0089	0.0694	0.1869	0.1195	0.0861	0.1347	0.3107	0.2087	0.0567	0.0091	0.03359	0.4339	0.2068	-0.0172	0	0

## Sheet: Supplementary Table 9
Source	Sum of Squares	df	Mean Square	F-value	p-value
Model	0.0066	5	0.0013	4.27	0.0038
PUV	0.0006	1	0.0006	1.82	0.1861
L	1.61e-06	1	1.61e-06	0.0052	0.9428
PUV L	0.0003	1	0.0003	0.8934	0.3509
PUV²	0.0004	1	0.0004	1.45	0.2359
L²	0.0049	1	0.0049	15.98	0.0003
Residual	0.0111	36	0.0003	-	-
Cor Total	0.0176	41	-	-	-
